# Supplementary material
Source: PubMed Central journal article supplement (PMC5654860)
Supplement: PRO-26-2229-s001.pdf [file PRO-26-2229-s001.pdf]

# **Analysis of IgG kinetic stability by differential scanning calorimetry, probe fluorescence and light scattering**

by

Michal Nemergut, Gabriel Žoldák, Jonas V. Schaefer, Florian Kast, Pavol Miškovský,  
Andreas Plückthun, and Erik Sedlák

**Figure S1**

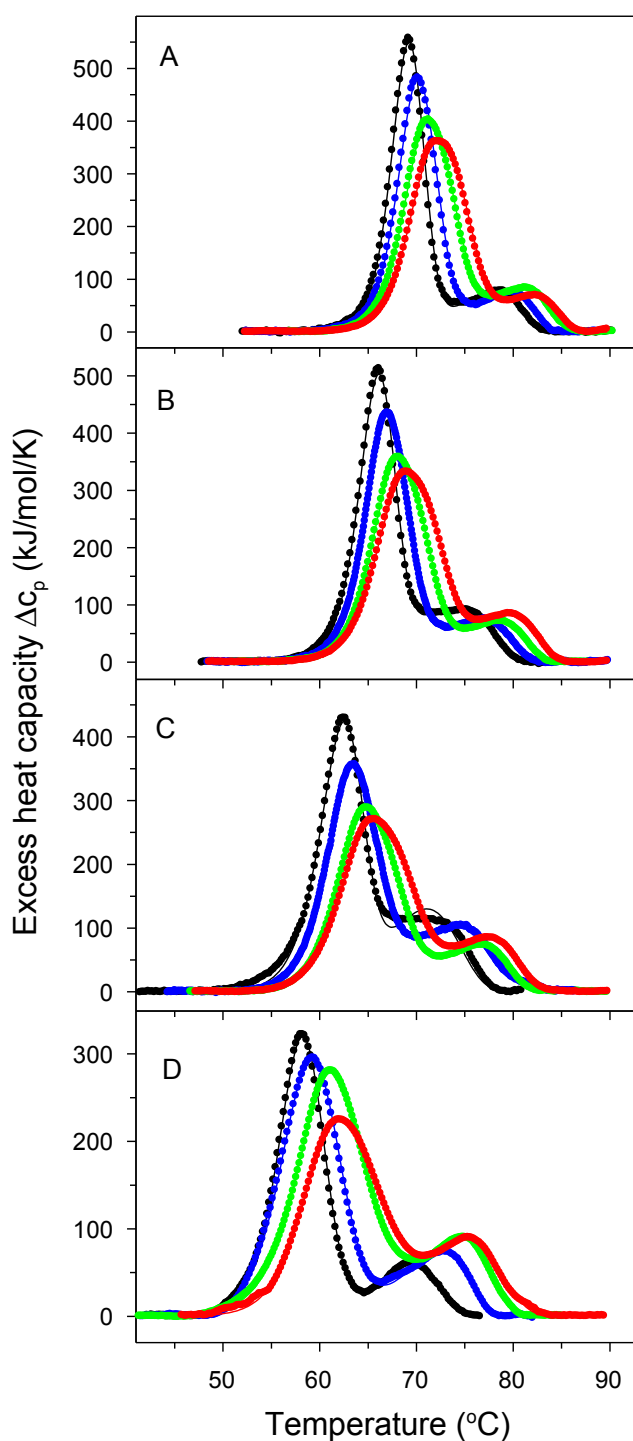

**Figure S1.** Effect of scan rate on DSC profile at increasing urea concentrations. Urea concentrations: 0 M (A), 1 M (B), 2 M (C), and 3 M (D). The used scan rates were 0.25 K/min (black), 0.5 K/min (blue), 1.0 K/min (green), and 1.5 K/min (red), respectively. Experimental data are shown as circles. The fits according our model (Eq. 4 and Eq. 5) are shown as solid lines in corresponding colors. IgG concentrations were 5  $\mu\text{M}$  in all measurements.

**Figure S2**

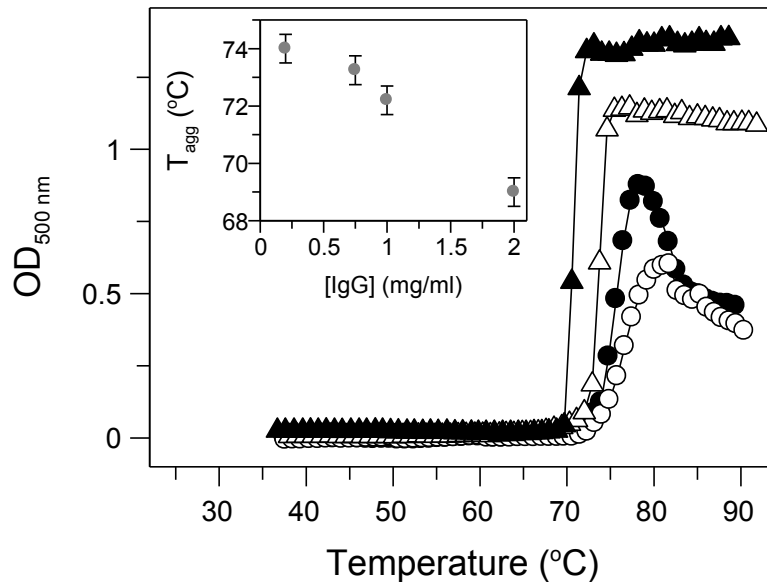

**Figure S2.** Effect of IgG concentration on its temperature-induced aggregation. IgG concentrations tested were: 0.2 mg/ml (white circles), 0.75 mg/ml (black circles), 1.0 mg/ml (white triangles), and 2.0 mg/ml (black triangles). The protein aggregation was monitored as absorbance at 500 nm. The scan rate was 1.0 K/min in all measurements. Inset:  $T_{agg}$ , defined as the temperature at which  $OD_{500\text{ nm}}$  reaches the value 0.1, as a function of IgG concentration.

**Figure S3**

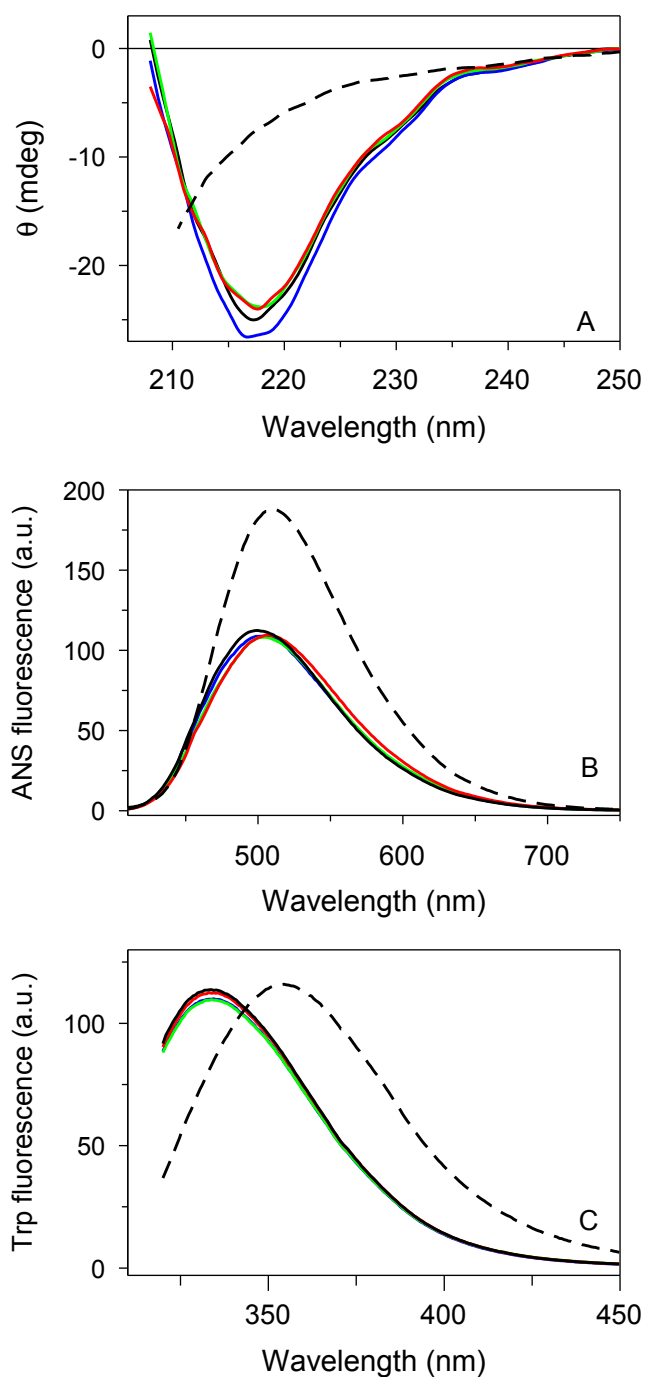

**Figure S3.** Increasing urea concentrations (0 M - black solid line, 1 M - blue solid line, 2 M - green solid line, and 3 M - red solid line) do not affect ellipticity (A), ANS fluorescence (B), and intrinsic tryptophan fluorescence (C). For comparison, the effect of 8.5 M urea, i.e. fully denaturing urea concentration, on the IgG6B3 properties is shown in dashed lines. The protein concentrations were 5  $\mu$ M in all measurements.

**Figure S4**

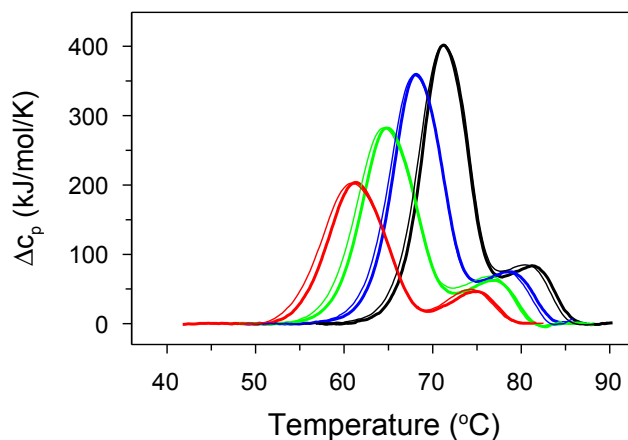

**Figure S4.** The presence of ANS does not affect DSC transitions of IgG6B3 in different urea concentrations (0 M - black solid line, 1 M - blue solid line, 2 M - green solid line, and 3 M - red solid line). DSC transitions of IgG6B3 in the presence of ANS (500  $\mu$ M, thin lines) and in the absence of ANS (thick lines). DSC scans were performed with a protein concentration of 0.75 mg/ml (5  $\mu$ M) in PBS pH 7.4 and a scan rate of 1.0 K/min.

**Figure S4**

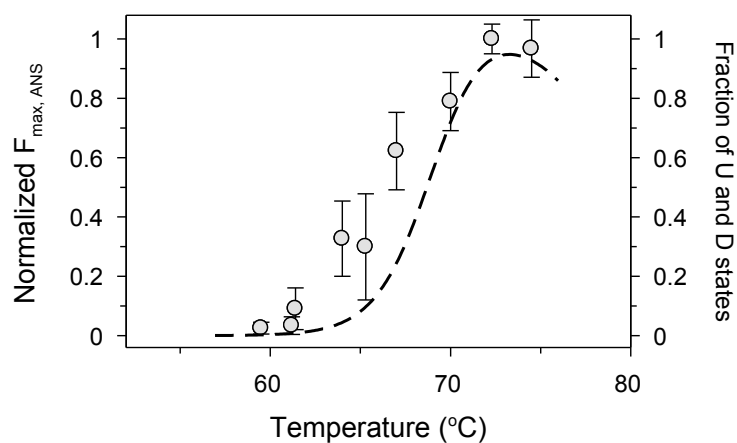

**Figure S4.** Combined molar fraction of states U and D as a function of temperature (dashed line), derived from Equation 5, and the normalized amplitudes of the ANS fluorescence (grey circles) obtained from the kinetic measurements shown in Figure 4. The ANS fluorescence measurements were performed with a protein concentration of 0.75 mg/ml (5  $\mu\text{M}$ ) and ANS concentration of 500  $\mu\text{M}$ .

**Figure S5**

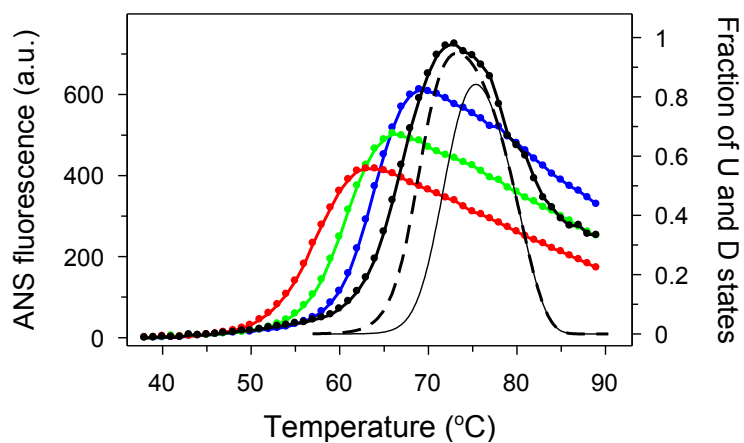

**Figure S5.** ANS fluorescence as a function of temperature at increasing urea concentrations (0 M - black solid line, 1 M - blue solid line, 2 M - green solid line, and 3 M - red solid line). The molar fraction of the states U and D (dashed line) and of the state D (thin solid line) as a function of temperature are also shown. The ANS fluorescence measurements were performed with a protein concentration of 0.75 mg/ml (5  $\mu$ M) and ANS concentration of 500  $\mu$ M at a scan rate of 1.0 K/min. The buffer was PBS at pH 7.4.

**Table S1.** Parameters describing individual steps of the thermal denaturation of IgG in the presence and in the absence of ANS at different urea concentrations analyzed according the kinetic model as shown in Equation 4. The protein concentration was 3.3  $\mu$ M. The scan rate of the measurements were 1.0 K/min.

| [Urea]<br>(M) |       | $T_{\text{trs}}$<br>( $^{\circ}$ C) | $\Delta H_{\text{cal1}}$<br>(kJ/mol) | $T_2^*$<br>( $^{\circ}$ C) | $E_{a2}$<br>(kJ/mol) | $T_3^*$<br>( $^{\circ}$ C) | $E_{a3}$<br>(kJ/mol) |
|---------------|-------|-------------------------------------|--------------------------------------|----------------------------|----------------------|----------------------------|----------------------|
| 0             | - ANS | 70.1                                | 583                                  | 75.8                       | 188                  | 84.3                       | 354                  |
|               | +ANS  | 69.1                                | 588                                  | 75.3                       | 251                  | 83.7                       | 349                  |
| 1             | - ANS | 66.7                                | 563                                  | 73.3                       | 190                  | 81.9                       | 338                  |
|               | +ANS  | 65.9                                | 556                                  | 73.0                       | 216                  | 81.3                       | 350                  |
| 2             | - ANS | 63.2                                | 514                                  | 71.4                       | 169                  | 80.4                       | 312                  |
|               | +ANS  | 62.2                                | 521                                  | 70.8                       | 193                  | 79.6                       | 330                  |
| 3             | - ANS | 59.9                                | 460                                  | 68.6                       | 158                  | 77.8                       | 280                  |
|               | +ANS  | 58.5                                | 507                                  | 67.5                       | 201                  | 77.1                       | 370                  |



**Table S2.** Parameters describing individual steps of the thermal denaturation of IgG at various scan rates and at different urea concentrations analyzed according the kinetic model as shown in Equation 4. The protein concentration was 5  $\mu$ M.

| [Urea]<br>(M) | Scan rate<br>(K/min) | T <sub>trs</sub><br>(°C) | $\Delta H_{call}$<br>(kJ/mol) | T <sub>2</sub> <sup>*</sup><br>(°C) | E <sub>a2</sub><br>(kJ/mol) | T <sub>3</sub> <sup>*</sup><br>(°C) | E <sub>a3</sub><br>(kJ/mol) |
|---------------|----------------------|--------------------------|-------------------------------|-------------------------------------|-----------------------------|-------------------------------------|-----------------------------|
| 0             | 0.25                 | 69.5                     | 650                           | 76.2                                | 193                         | 86.7                                | 310                         |
|               | 0.5                  | 69.5                     | 621                           | 76.4                                | 171                         | 84.6                                | 358                         |
|               | 1.0                  | 70.1                     | 583                           | 75.8                                | 188                         | 84.3                                | 354                         |
|               | 1.5                  | 70.2                     | 635                           | 75.3                                | 242                         | 83.8                                | 366                         |
| Average       | -                    | 69.9<br>$\pm 0.3$        | 622<br>$\pm 29$               | 75.9<br>$\pm 0.5$                   | 198<br>$\pm 30$             | 84.9<br>$\pm 1.3$                   | 347<br>$\pm 25$             |
| 1             | 0.25                 | 66.6                     | 548                           | 73.9                                | 166                         | 86.4                                | 236                         |
|               | 0.5                  | 66.6                     | 570                           | 74.5                                | 159                         | 83.1                                | 303                         |
|               | 1.0                  | 66.7                     | 563                           | 73.3                                | 190                         | 81.9                                | 338                         |
|               | 1.5                  | 66.8                     | 552                           | 73.2                                | 197                         | 81.9                                | 335                         |
| Average       | -                    | 66.7<br>$\pm 0.1$        | 558<br>$\pm 10$               | 73.7<br>$\pm 0.6$                   | 178<br>$\pm 18$             | 83.3<br>$\pm 2.1$                   | 303<br>$\pm 47$             |
| 2             | 0.25                 | 64.0                     | 386                           | 70.3                                | 151                         | 85.4                                | 205                         |
|               | 0.5                  | 63.0                     | 472                           | 73.7                                | 166                         | 84.0                                | 225                         |
|               | 1.0                  | 63.2                     | 514                           | 71.4                                | 169                         | 80.4                                | 312                         |
|               | 1.5                  | 63.2                     | 502                           | 71.0                                | 172                         | 80.2                                | 303                         |
| Average       | -                    | 63.2<br>$\pm 0.4$        | 469<br>$\pm 58$               | 71.6<br>$\pm 1.5$                   | 165<br>$\pm 9$              | 82.5<br>$\pm 2.6$                   | 261<br>$\pm 54$             |
| 3             | 0.25                 | 58.3                     | 446                           | 70.5                                | 138                         | 77.7                                | 315                         |
|               | 0.5                  | 58.4                     | 456                           | 70.5                                | 139                         | 78.5                                | 294                         |
|               | 1.0                  | 59.9                     | 460                           | 68.6                                | 158                         | 77.8                                | 280                         |
|               | 1.5                  | 59.7                     | 417                           | 69.0                                | 133                         | 79.1                                | 253                         |
| Average       | -                    | 59.1<br>$\pm 0.8$        | 445<br>$\pm 19$               | 69.3<br>$\pm 1.5$                   | 142<br>$\pm 11$             | 78.3<br>$\pm 0.7$                   | 286<br>$\pm 26$             |

**Table S3.** Rate constants of ANS binding to IgG at different temperatures at different urea concentrations. The rate constant were calculated according Equations 1-3.

| [Urea]<br>(M) | T<br>(°C) | k <sub>1</sub><br>(min <sup>-1</sup> ) | k <sub>2</sub><br>(min <sup>-1</sup> ) | k<br>(min <sup>-1</sup> ) |
|---------------|-----------|----------------------------------------|----------------------------------------|---------------------------|
| 0             | 59.5      | 0.0423                                 | -                                      | 0.0423                    |
|               | 61.2      | 0.0347                                 | -                                      | 0.0347                    |
|               | 61.4      | 0.0723                                 | -                                      | 0.0723                    |
|               | 64.0      | 0.0967                                 | 1.0345                                 | 0.0884                    |
|               | 65.3      | 0.0931                                 | 1.1046                                 | 0.0859                    |
|               | 67.0      | 0.1500                                 | 1.5954                                 | 0.1371                    |
|               | 70.0      | 0.6112                                 | 0.6112                                 | 0.3056                    |
|               | 72.3      | 0.9492                                 | 0.9492                                 | 0.4746                    |
|               | 74.5      | 1.2252                                 | 1.2252                                 | 0.6126                    |
| 1             | 56.8      | 0.0376                                 | -                                      | 0.0376                    |
|               | 57.8      | 0.0341                                 | -                                      | 0.0341                    |
|               | 59.3      | 0.0478                                 | -                                      | 0.0478                    |
|               | 59.5      | 0.0496                                 | -                                      | 0.0496                    |
|               | 60.1      | 0.0575                                 | 1.9822                                 | 0.0559                    |
|               | 60.9      | 0.0853                                 | 0.8431                                 | 0.0775                    |
|               | 62.5      | 0.1070                                 | 1.0911                                 | 0.0975                    |
|               | 63.8      | 0.1668                                 | 1.0208                                 | 0.1434                    |
|               | 65.2      | 0.3286                                 | 0.6807                                 | 0.2216                    |
| 67.4          | 0.6218    | 0.6218                                 | 0.3109                                 |                           |
| 70.5          | 0.9338    | 1.7036                                 | 0.6032                                 |                           |
| 2             | 52.5      | 0.0235                                 | -                                      | 0.0235                    |
|               | 54.0      | 0.0361                                 | -                                      | 0.0361                    |
|               | 55.7      | 0.0691                                 | -                                      | 0.0691                    |
|               | 58.3      | 0.0839                                 | 0.6742                                 | 0.0746                    |
|               | 60.4      | 0.1563                                 | 0.6128                                 | 0.1246                    |
|               | 62.0      | 0.3481                                 | 0.3481                                 | 0.1740                    |
|               | 63.5      | 0.3007                                 | 0.6539                                 | 0.2060                    |
|               | 65.5      | 0.6400                                 | 0.6400                                 | 0.3200                    |
|               | 69.5      | 2.5551                                 | 2.0052                                 | 1.1235                    |
| 3             | 50.7      | 0.0352                                 | 0.1261                                 | 0.0275                    |
|               | 52.0      | 0.0450                                 | 0.3247                                 | 0.0397                    |
|               | 53.0      | 0.0563                                 | 0.1798                                 | 0.0429                    |
|               | 53.4      | 0.0610                                 | 0.1614                                 | 0.0443                    |
|               | 54.3      | 0.0731                                 | 0.1925                                 | 0.0530                    |
|               | 55.7      | 0.0967                                 | 0.5544                                 | 0.0823                    |
|               | 58.0      | 0.2824                                 | 0.5051                                 | 0.1811                    |
|               | 60.1      | 0.6537                                 | 0.6537                                 | 0.3268                    |
|               | 60.2      | 0.4325                                 | 0.4325                                 | 0.2163                    |
| 62.2          | 0.7784    | 0.7784                                 | 0.3892                                 |                           |
